# Supplementary material for: The Emerging Applications of Synthetic Data in Neurosurgery Research and Practice: A Systematic Review
Source: bioRxiv or medRxiv preprint supplement (doi:10.1101/2024.03.04.24303724), 2024-03-04
Supplement: Supplementary file [file media-2.pdf]

## Identification of new studies via databases and registers

### Identification

Records identified from:  
Databases (n = 4)  
Registers (n = 0)

Records removed before screening:  
Duplicate records (n = 12)  
Records marked as ineligible by automation  
tools (n = 31)  
Records removed for other reasons (n = 15)

### Screening

Records screened  
(n = 34)

Records excluded  
(n = 7)

Reports sought for retrieval  
(n = 27)

Reports not retrieved  
(n = 2)

Reports assessed for eligibility  
(n = 25)

Reports excluded:  
Lack of Relevance (n = 11)  
Insufficient Methodological Rigor (n = 1)

### Included

New studies included in review  
(n = 13)  
Reports of new included studies  
(n = 0)
